# Supplementary material for: Controlled Release of Vascular Endothelial Growth Factor from Heparin-Functionalized Gelatin Type A and Albumin Hydrogels
Source: PubMed Central journal article supplement (PMC6318598; doi:10.3390/gels3040035), 2017-10-09
Supplement: gels-03-00035-s001.pdf [file gels-03-00035-s001.pdf]

# Controlled Release of Vascular Endothelial Growth Factor from Heparin-functionalized Gelatin Type A and Albumin Hydrogels

Christiane Claaßen, Lisa Sewald, Günter E. M. Tovar and Kirsten Borchers

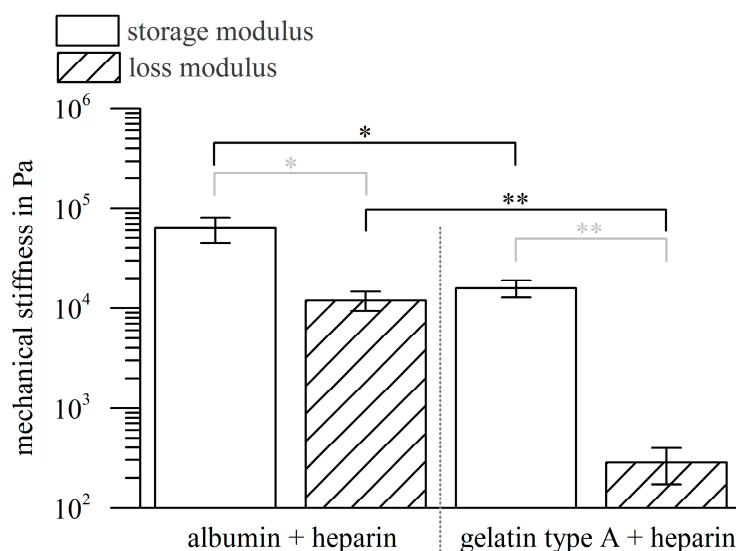

**Figure S1.** Results of the rheological characterization of the hydrogels. Hydrogels were prepared with gelatin type A or albumin (10 wt%), 1 wt% heparin (1 wt%) and an EDC concentration of 0.125 M. The storage modulus of both hydrogel types was significantly higher than the loss modulus; albumin-based hydrogels had higher mechanical stiffnesses compared to gelatin type A-based hydrogels. (\*:  $p < 0.05$ ; \*\*:  $p < 0.01$ ;  $n=3$ )

**Table S1.** Values for the cumulative release of VEGF from albumin-heparin hydrogels (10 wt% albumin, 1 wt% heparin). Four hydrogels were prepared with two EDC concentrations (0.125 M and 0.150 M) and hydrogels were loaded by swelling for 1 h or 3 h in VEGF solution (1  $\mu\text{g}$  VEGF per mL; loading with 0.1  $\mu\text{g}$  VEGF per mg hydrogel dry weight).

|                    | 0.125 M/1 h | 0.125 M/3 h | 0.15 M/1 h | 0.15 M/3 h |
|--------------------|-------------|-------------|------------|------------|
| Loading Efficiency | 82.50%      | 75.97%      | 87.15%     | 80.25%     |
| 0.25 d             | 9.05%       | 6.10%       | 4.51%      | 4.46%      |
| 1 d                | 12.67%      | 10.22%      | 7.10%      | 7.40%      |
| 2 d                | 17.22%      | 14.24%      | 9.77%      | 10.24%     |
| 5 d                | 19.26%      | 17.76%      | 12.26%     | 13.24%     |
| 7 d                | 21.31%      | 19.98%      | 14.17%     | 15.41%     |
| 14 d               | 30.35%      | 35.51%      | 24.08%     | 29.07%     |
| 21 d               | 42.53%      | 42.06%      | 38.70%     | 41.37%     |

**Table S2.** Values for the cumulative release of VEGF from gelatin type A-heparin hydrogels (10 wt% gelatin type A, 1 wt% heparin). Four hydrogels were prepared with two EDC concentrations (0.125 M and 0.150 M) and hydrogels were loaded by swelling for 1 h or 3 h in VEGF solution (1  $\mu$ g VEGF per mL; loading with 0.1  $\mu$ g VEGF per mg hydrogel dry weight).

|                              | <b>0.125 M/1 h</b> | <b>0.125 M/3 h</b> | <b>0.15 M/1 h</b> | <b>0.15 M/3 h</b> |
|------------------------------|--------------------|--------------------|-------------------|-------------------|
| <i>Loading Efficiency</i>    | 51.63%             | 36.12%             | 41.57%            | 35.64%            |
| 0.25 d                       | 13.74%             | 15.94%             | 14.47%            | 12.18%            |
| 1 d                          | 16.98%             | 20.53%             | 17.16%            | 16.10%            |
| 2 d                          | 19.18%             | 23.38%             | 18.76%            | 18.53%            |
| 5 d                          | 20.75%             | 25.73%             | 20.22%            | 20.68%            |
| 7 d                          | 21.69%             | 27.04%             | 21.07%            | 21.93%            |
| 14 d                         | 22.94%             | 29.08%             | 23.05%            | 23.88%            |
| 21 d                         | 24.75%             | 30.69%             | 24.38%            | 25.07%            |
| <i>Collagenase Digestion</i> | 7.99%              | 9.80%              | 7.20%             | 7.71%             |

**Table S3.** Values for the release rates of VEGF from albumin-heparin hydrogels (10 wt% albumin, 1 wt% heparin). Four hydrogels were prepared with two EDC concentrations (0.125 M and 0.150 M) and hydrogels were loaded by swelling for 1 h or 3 h in VEGF solution (1  $\mu$ g VEGF per mL; loading with 0.1  $\mu$ g VEGF per mg hydrogel dry weight).

|        | <b>0.125 M/1 h</b> | <b>0.125 M/3 h</b> | <b>0.15 M/1 h</b> | <b>0.15 M/3 h</b> |
|--------|--------------------|--------------------|-------------------|-------------------|
| 0.25 d | 36.21%             | 24.39%             | 18.05%            | 17.85%            |
| 1 d    | 4.82%              | 5.50%              | 3.45%             | 3.91%             |
| 2 d    | 4.55%              | 4.02%              | 2.68%             | 2.84%             |
| 5 d    | 1.02%              | 1.18%              | 0.83%             | 1.00%             |
| 7 d    | 1.03%              | 1.11%              | 0.96%             | 1.09%             |
| 14 d   | 1.29%              | 2.22%              | 1.42%             | 1.95%             |
| 21 d   | 1.74%              | 0.94%              | 2.09%             | 1.76%             |

**Table S4.** Values for the release rates of VEGF from gelatin type A-heparin hydrogels (10 wt% gelatin type A, 1 wt% heparin). Four hydrogels were prepared with two EDC concentrations (0.125 M and 0.150 M) and hydrogels were loaded by swelling for 1 h or 3 h in VEGF solution (1  $\mu$ g VEGF per mL; loading with 0.1  $\mu$ g VEGF per mg hydrogel dry weight).

|        | <b>0.125 M/1 h</b> | <b>0.125 M/3 h</b> | <b>0.15 M/1 h</b> | <b>0.15 M/3 h</b> |
|--------|--------------------|--------------------|-------------------|-------------------|
| 0.25 d | 54.98%             | 63.75%             | 57.87%            | 48.74%            |
| 1 d    | 4.32%              | 6.12%              | 3.60%             | 5.22%             |
| 2 d    | 2.20%              | 2.84%              | 1.60%             | 2.43%             |
| 5 d    | 0.52%              | 0.78%              | 0.49%             | 0.72%             |
| 7 d    | 0.47%              | 0.66%              | 0.42%             | 0.63%             |
| 14 d   | 0.18%              | 0.29%              | 0.28%             | 0.28%             |
| 21 d   | 0.26%              | 0.23%              | 0.19%             | 0.17%             |
